# Supplementary material for: Singlet and triplet excitons and charge polarons in cycloparaphenylenes: a density functional theory study
Source: Royal Society of Chemistry journal article supplement (doi:10.1039/c5cp01782c), 2015-01-01
Supplement: c5cp01782c1.pdf [file c5cp01782c1.pdf]

## Supporting Information

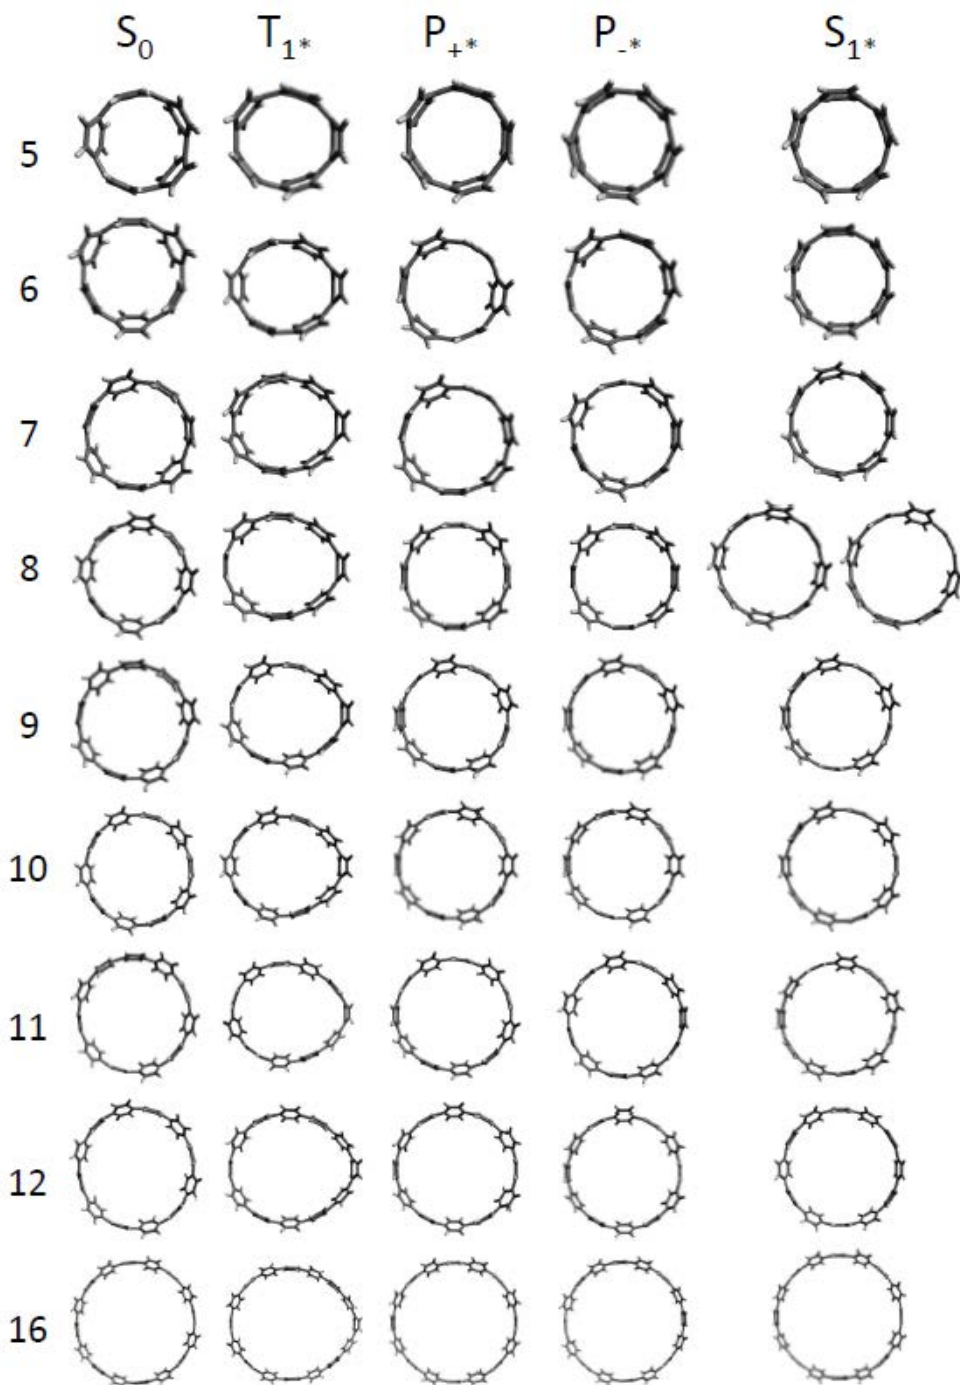

**Figure S1.** Optimized structures for [n]CPPs at  $S_0$ ,  $S_{1*}$ ,  $T_{1*}$ ,  $P_{+*}$  and  $P_{-*}$  states. [8]CPP shows quasidegenerate fluorescence state  $S_{1*}$ : uniform (left) and deformed (right).

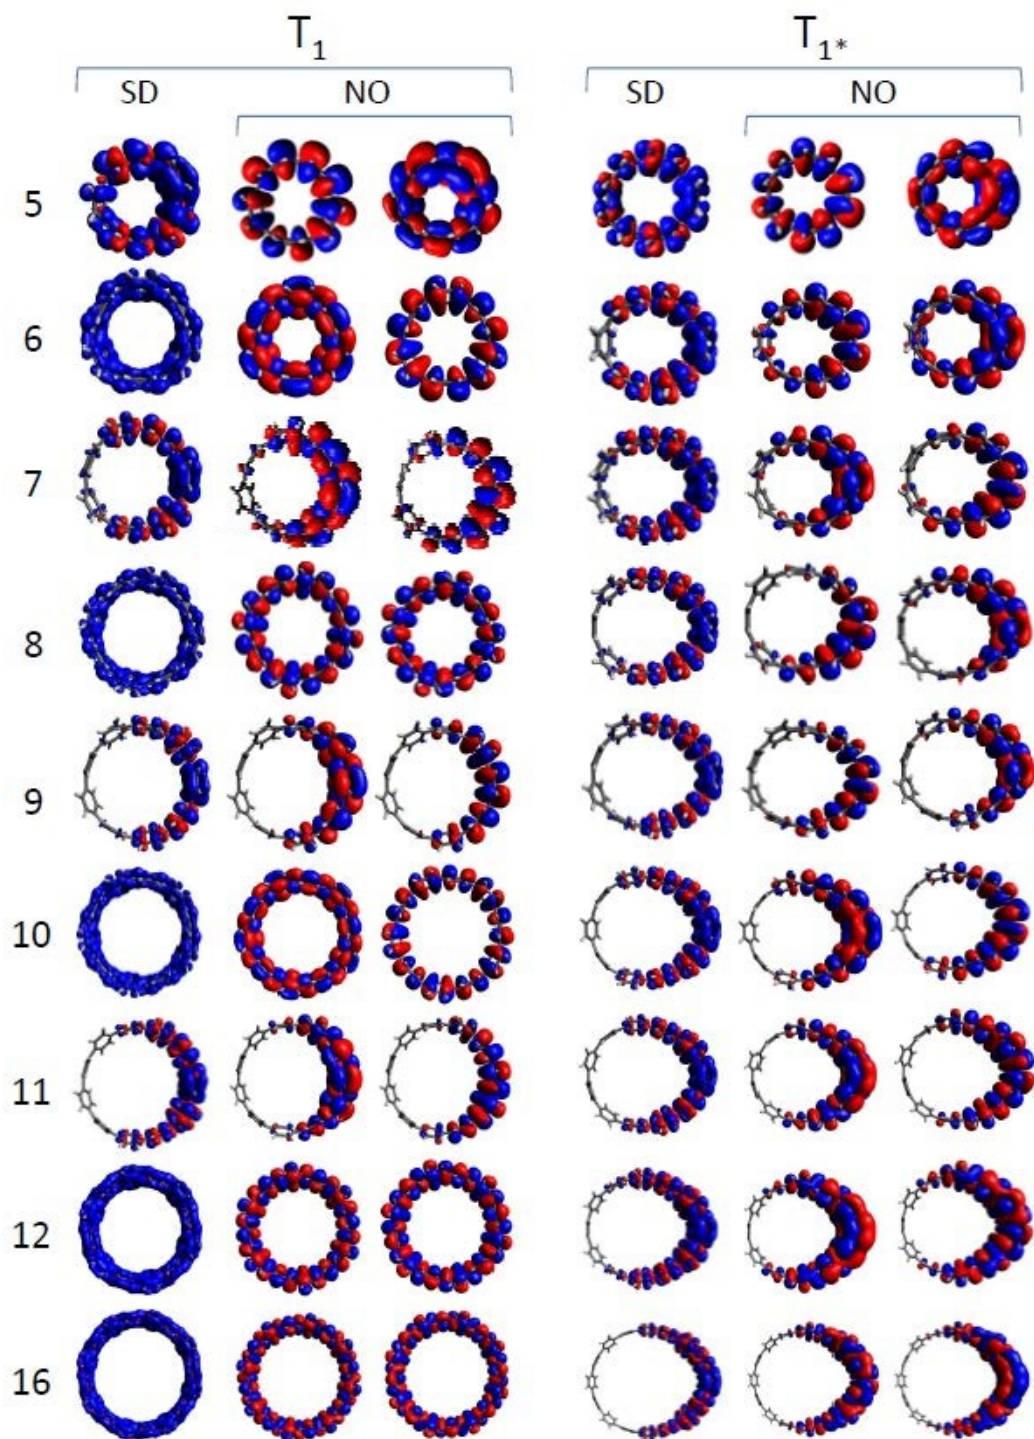

**Figure S2.** Natural orbitals (NO) and spin density (SD) of triplet states.

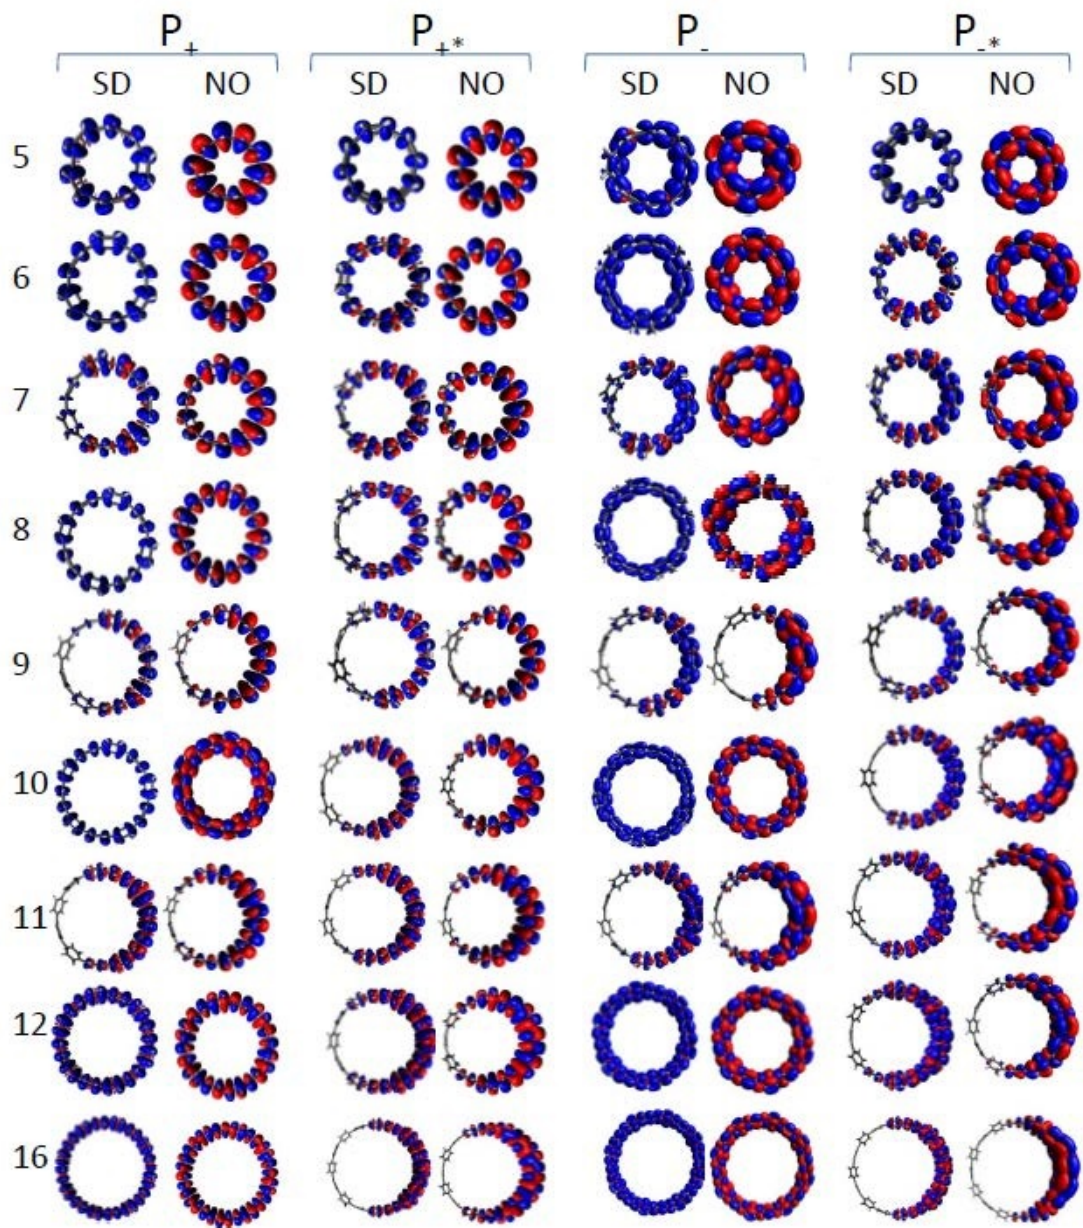

**Figure S3.** Natural orbital (NO) and spin density (SD) of polaronic states.
